# Supplementary material for: Determination of nine prohibited N-nitrosamines in cosmetic products by vortex-assisted dispersive liquid–liquid microextraction prior to gas chromatography-mass spectrometry
Source: Royal Society of Chemistry journal article supplement (doi:10.1039/d2ra06553c), 2023-01-01
Supplement: d2ra06553c1.pdf [file d2ra06553c1.pdf]

## SUPPLEMENTARY INFORMATION

---

**Determination of nine prohibited N-nitrosamines in cosmetic products by vortex-assisted dispersive liquid–liquid microextraction prior to gas chromatography-mass spectrometry**

Lorenza Schettino, Juan L. Benedé, Alberto Chisvert\*

GICAPC Research Group, Department of Analytical Chemistry, University of Valencia, 46100 Burjassot, Valencia, Spain

---

\* corresponding author  
E-mail address: [alberto.chisvert@uv.es](mailto:alberto.chisvert@uv.es) (A. Chisvert)

**Table S1.** Box-Behnken design for multivariate optimization of the critical variables.

| Step | CHCl <sub>3</sub> volume (μL) |       | Vortex time (s) |       | Ionic strength (%NaCl, w/v) |       |
|------|-------------------------------|-------|-----------------|-------|-----------------------------|-------|
|      | Uncoded                       | Coded | Uncoded         | Coded | Uncoded                     | Coded |
| 1    | 60                            | -1    | 60              | 0     | 0                           | -1    |
| 2    | 150                           | 1     | 60              | 0     | 0                           | -1    |
| 3    | 60                            | -1    | 60              | 0     | 10                          | 1     |
| 4    | 150                           | 1     | 60              | 0     | 10                          | 1     |
| 5    | 60                            | -1    | 30              | -1    | 5                           | 0     |
| 6    | 150                           | 1     | 30              | -1    | 5                           | 0     |
| 7    | 60                            | -1    | 90              | 1     | 5                           | 0     |
| 8    | 150                           | 1     | 90              | 1     | 5                           | 0     |
| 9    | 105                           | 0     | 30              | -1    | 0                           | -1    |
| 10   | 105                           | 0     | 30              | -1    | 10                          | 1     |
| 11   | 105                           | 0     | 90              | 1     | 0                           | -1    |
| 12   | 105                           | 0     | 90              | 1     | 10                          | 1     |
| 13   | 105                           | 0     | 60              | 0     | 5                           | 0     |
| 14   | 105                           | 0     | 60              | 0     | 5                           | 0     |
| 15   | 105                           | 0     | 60              | 0     | 5                           | 0     |

## Box-Benhken design

Box-Benhken designs are a class of rotatable or nearly rotatable second-order designs used to generate high order response.

The total number of experiments required for the development of the Box-Benhken design ( $N$ ) is defined by the following equation:

$$N = 2k(k-1) + Cp \quad (1)$$

where  $k$  is the number of factors (i.e., 3), and  $Cp$  is the number of replicates of the central point. In this sense, performing 3 replicates of the central point and according to Equation (1), 15 experiments were required. As shown in Table 3, the range of each factor was defined between a high and low value.

The following quadratic polynomial equation was applied to evaluate the multiple linear regression for each response:

$$Y = \beta_0 + \sum \beta_i X_i + \sum \beta_{ii} X_i^2 + \sum \beta_{ij} X_i X_j + \varepsilon \quad (2)$$

where  $Y$  is the analytical response;  $\beta_0$  is the constant term;  $\beta_i$ ,  $\beta_{ii}$  and  $\beta_{ij}$  represent the regression coefficients of the design;  $x_i$  and  $x_j$  are the different variables; and  $\varepsilon$  is the residual error.

Afterwards, the global desirability of the experiment ( $D$ ) was applied to study the different responses and achieve the optimal extraction conditions to enhance the analytical responses of the target analytes:

$$D = (d_1(Y_1) \cdot d_2(Y_2) \cdots d_n(Y_n))^{1/n} \quad (3)$$

where  $n$  is the number of responses in the optimization process, and  $d_i(Y_i)$  is the individual desirability of each response in the experiment. The individual desirability is calculated as:

$$di = Y_i - Y_{\min} / Y_{\max} - Y_{\min} \quad (4)$$

Responses are ranked between 0 and 1, respectively, to define undesirable responses and fully desirable responses.

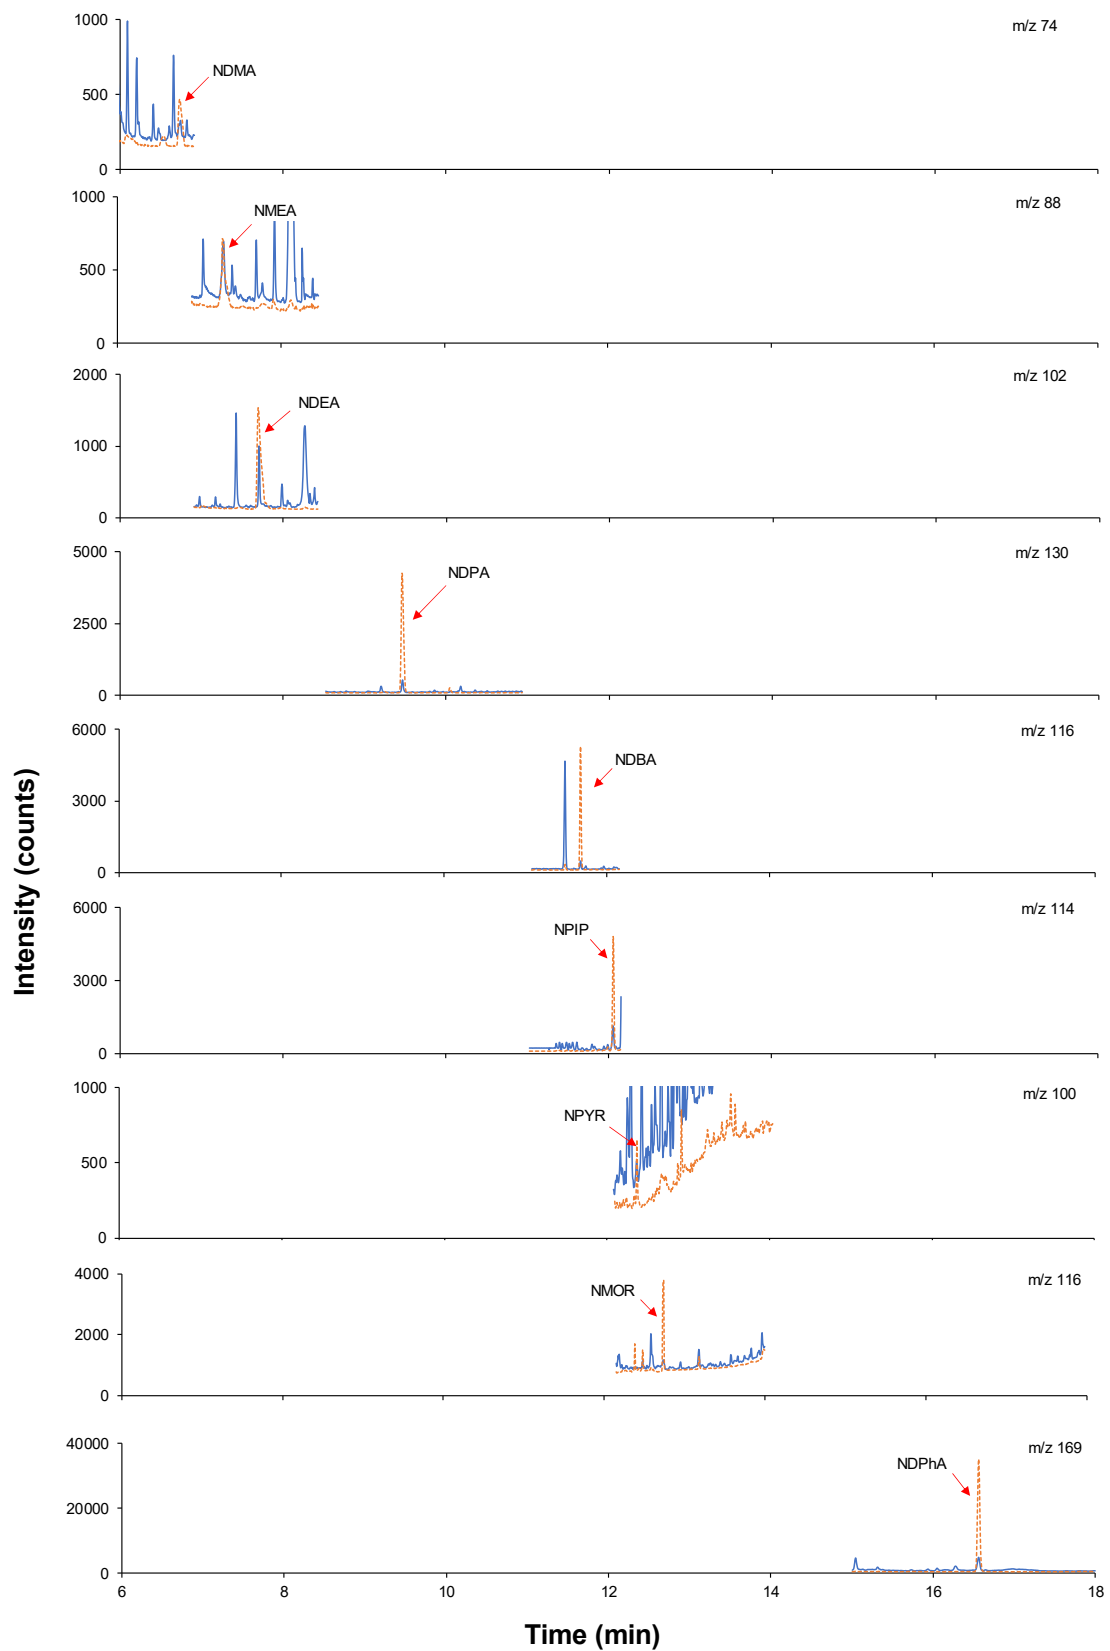

**Figure S1.** Chromatogram of a standard solution containing the analytes at  $10 \text{ ng mL}^{-1}$  subjected to the VA-DLLME procedure (dotted orange line), and (b) unextracted (continuous blue line).

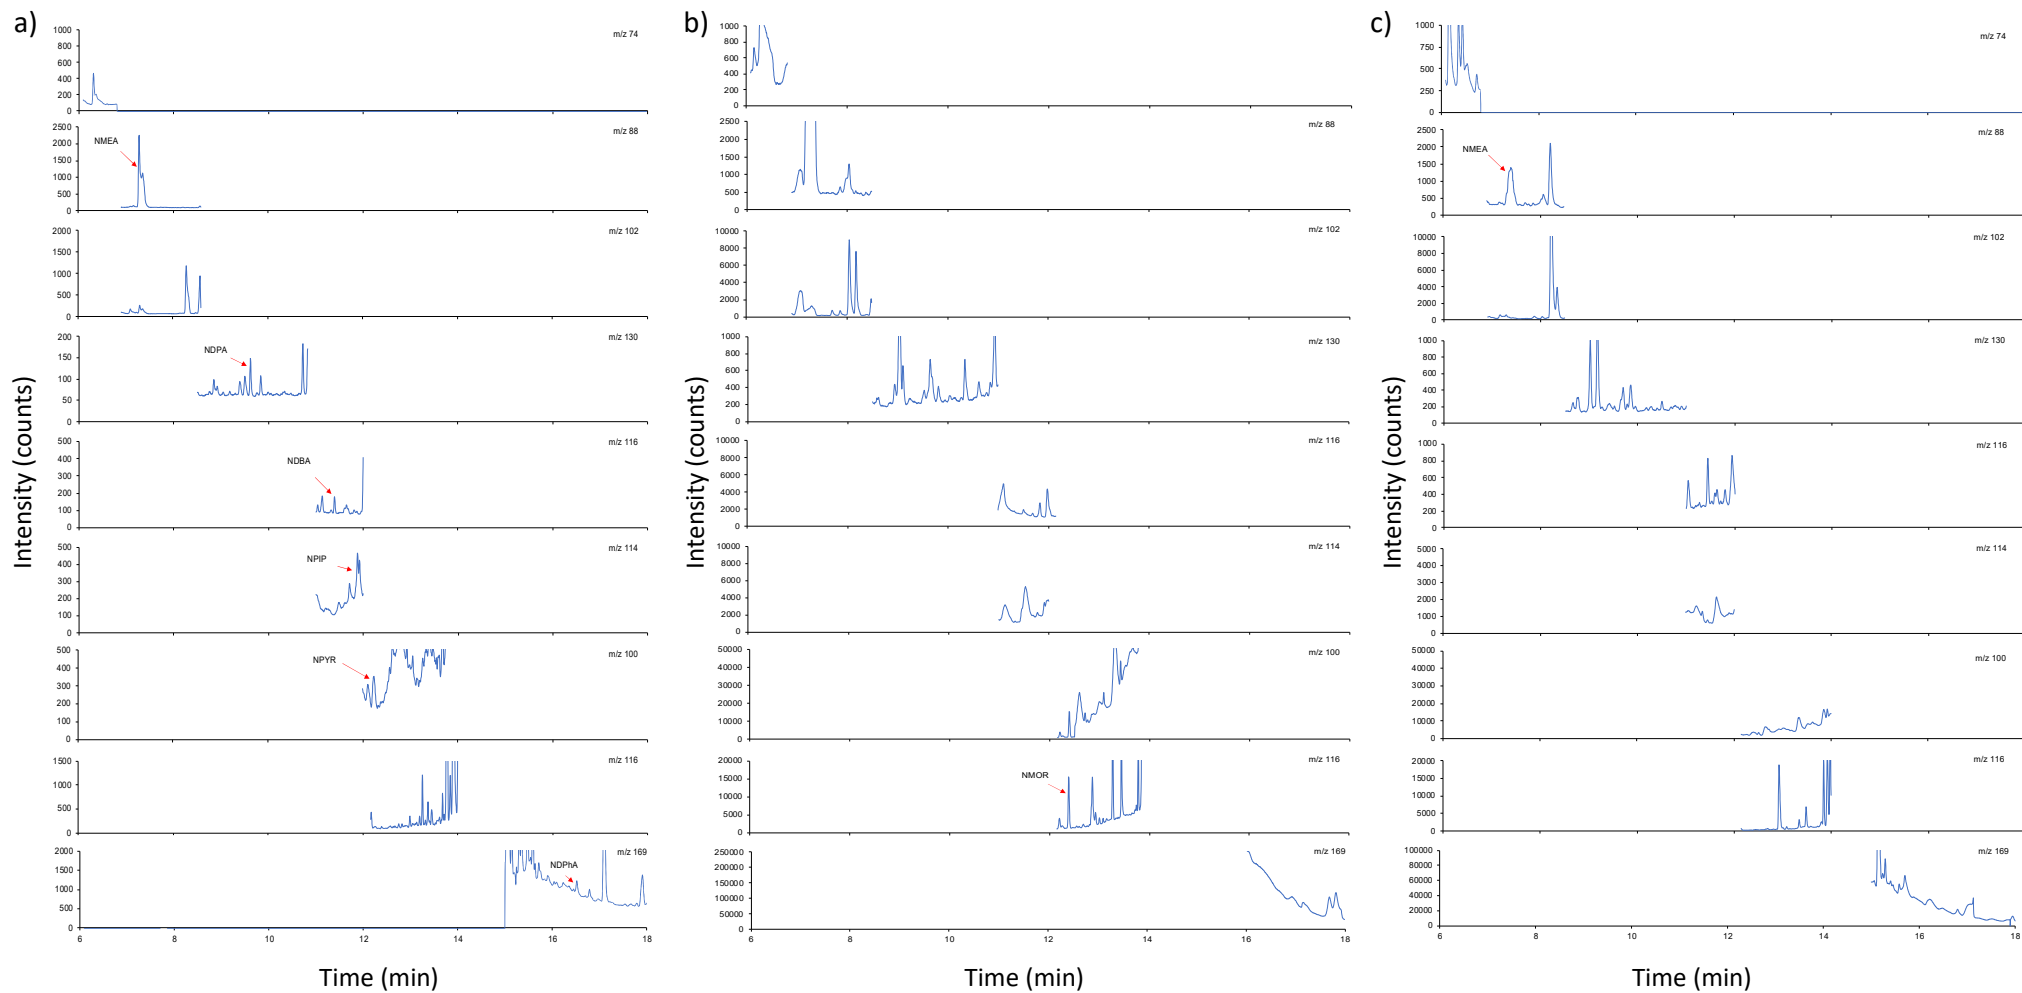

**Figure S2.** Chromatograms of sample solutions subjected to the proposed VA-DLLME method: (a) aftersun gel, (b) body cream 1, and (c) body cream 2.
